# Supplementary material for: Los fondos de inversión: gestión y valoración
Source: MDPI journal article supplement (doi:10.3390/antiox10091398), 1999-01-01
Supplement: s1 [file s1]

## Supplementary Materials

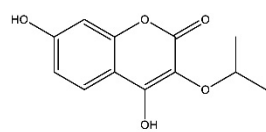

TA293

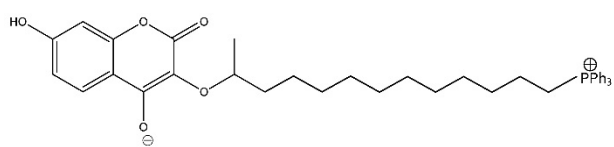

mito TA293

**Figure S1.** Structures of TA293 and mitoTA293.

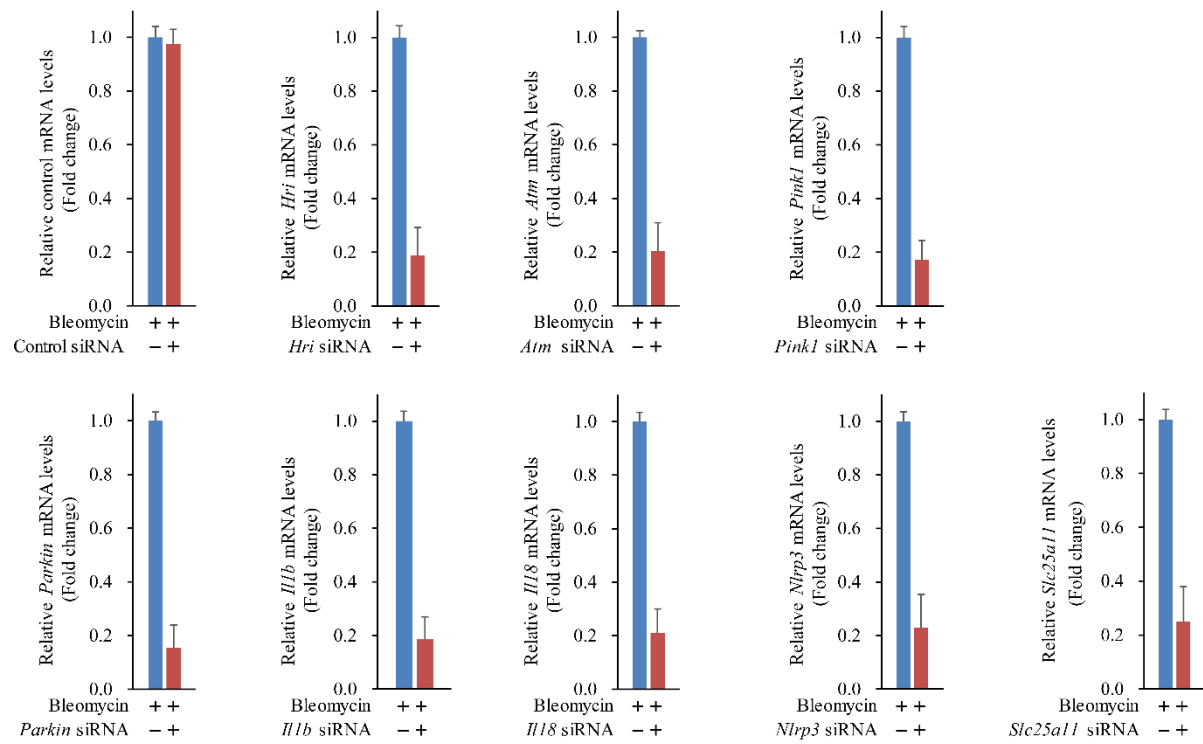

**Figure S2.** Knockdown efficiency of each siRNA transfected into primary pulmonary alveolar epithelial cells (PAECs). Expression levels of siRNA target genes were quantified by qRT-PCR.

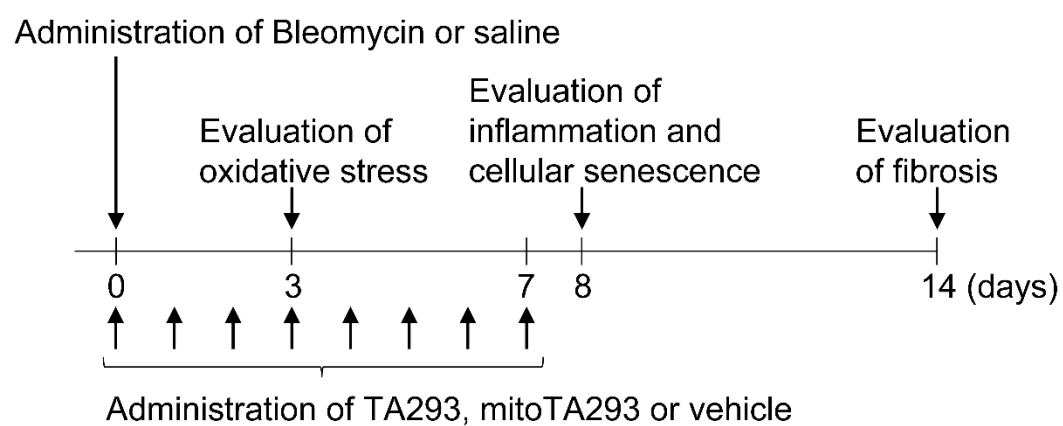

**Figure S3.** Mice exposed to 20 mg/kg bleomycin (BLM) were sprayed with TA293 (10 mg/kg) or mitoTA293 (10 mg/kg) intratracheally once a day using a microsyringe from day 0 to day 7.

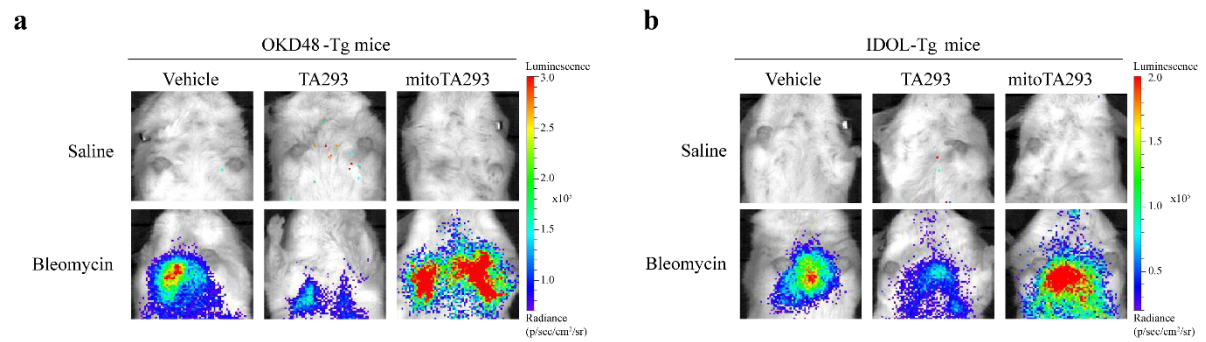

**Figure S4.** Examination of the effects of TA293 and mitoTA293 on oxidative stress and inflammation in BLM-induced pulmonary fibrosis model mice based on *in vivo* imaging. Representative images of (a) oxidative stress and (b) inflammation in the lungs of OKD48- and IDOL-Tg mice.

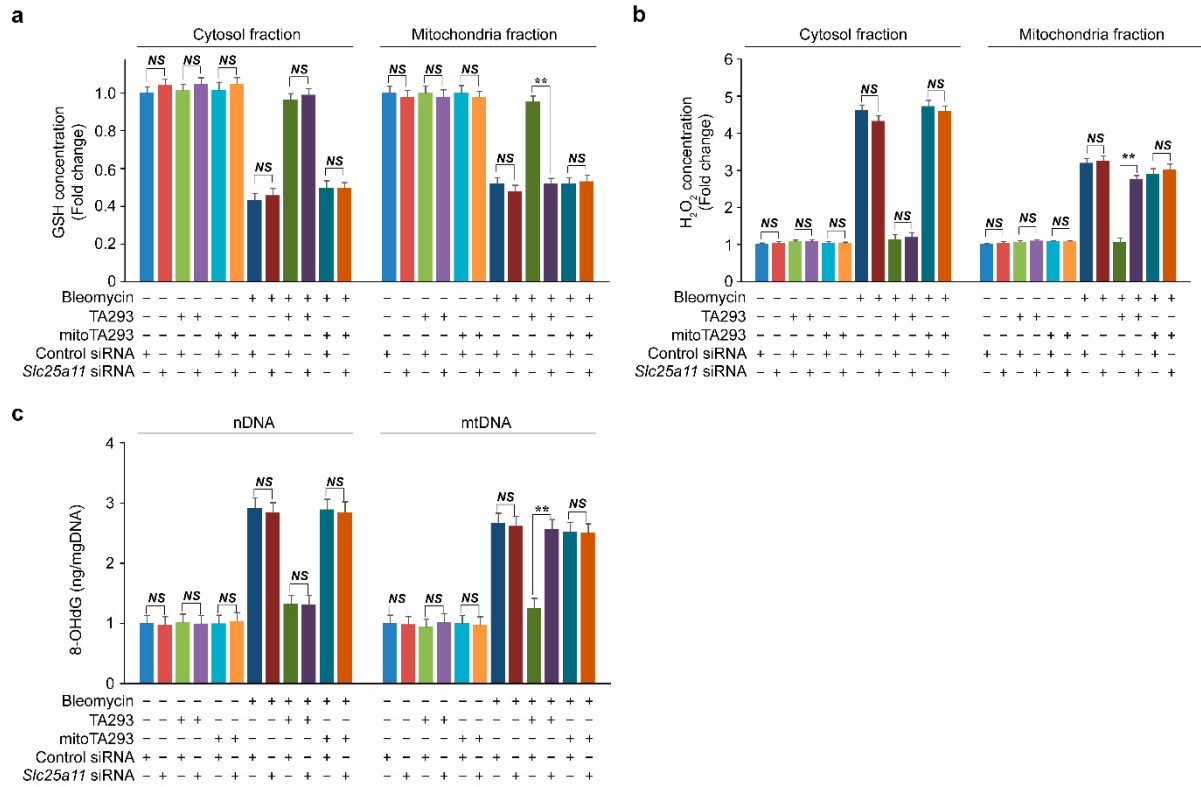

**Figure S5.** Effects of TA293 and mitoTA293 on the production of lipid peroxide, glutathione (GSH), H<sub>2</sub>O<sub>2</sub>, and oxidized DNA in the cytosol and mitochondrial fractions in BLM-induced PAECs in SLC25A11 siRNA-transfected mice. Concentrations of (a) GSH, (b) H<sub>2</sub>O<sub>2</sub>, and (c) 8-OHdG in the cytosol and mitochondrial fractions in BLM-induced PAECs. The data are presented as the mean SEM ( $n = 5$  per group); \*\*  $p < 0.01$ ; NS, not significant.

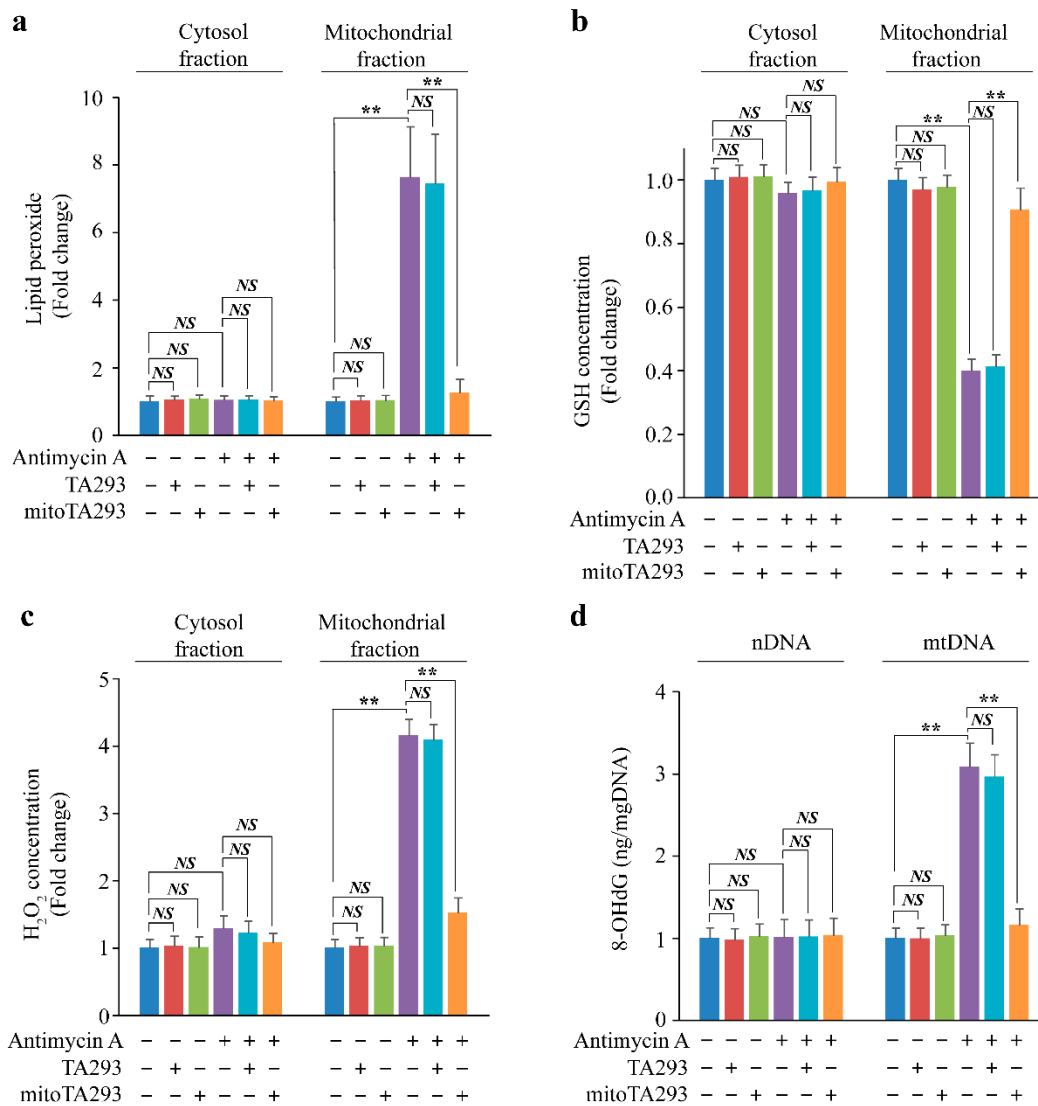

**Figure S6.** Effects of TA293 and mitoTA293 on the production of lipid peroxide, GSH, H<sub>2</sub>O<sub>2</sub>, and oxidized DNA in the cytosol and mitochondrial fractions in antimycin A-induced PAECs. Concentrations of (a) lipid peroxide, (b) GSH, (c) H<sub>2</sub>O<sub>2</sub>, and (d) 8-OHdG in the cytosol and mitochondrial fractions in BLM-induced PAECs. The data are presented as the mean SEM ( $n = 5$  per group); \*\*  $p < 0.01$ ; NS, not significant.

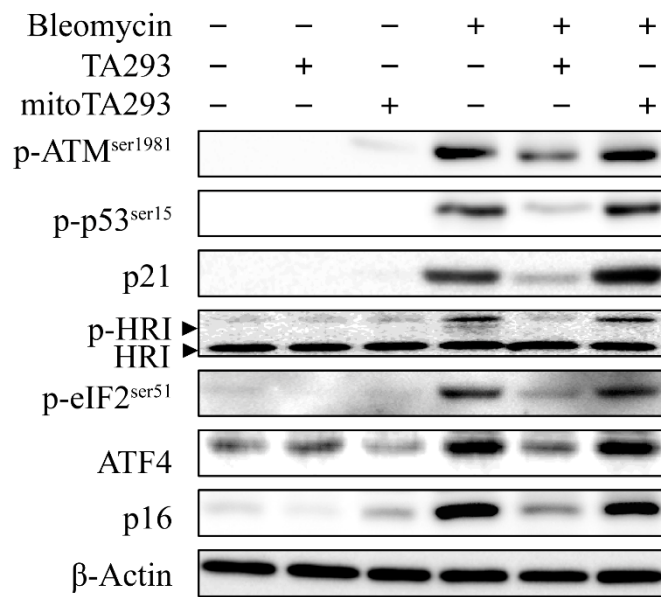

**Figure S7.** Effects of TA293 and mitoTA293 on p-ATM<sup>ser1981</sup>/p-p53<sup>ser15</sup>/p21 and p-HRI/p-eIF2<sup>ser51</sup>/ATF4/p16 pathways in BLM-induced PAECs in the lungs of BLM-induced lung fibrosis model mice. These expression levels were detected by western blotting analysis in the lungs of mice 8 days after BLM administration.

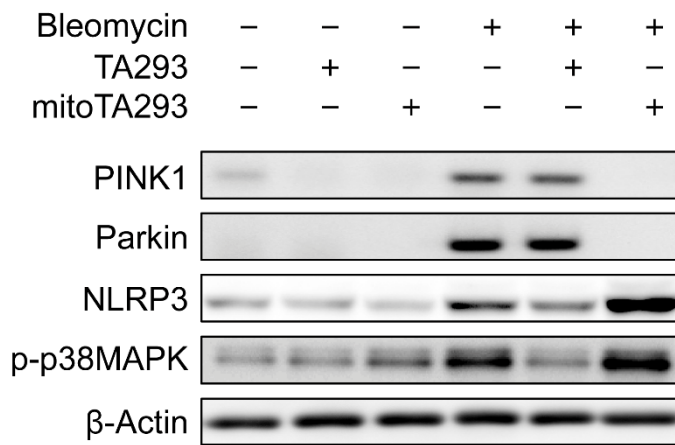

**Figure S8.** Effects of TA293 and mitoTA293 on the expression of PINK1, Parkin, and the NLRP3 inflammasome and phosphorylation of p38MAPK in the lungs of BLM-induced lung fibrosis model mice. These expression levels were detected by western blotting analysis in the lungs of mice 8 days after BLM administration.
